# Supplementary material
Source: PubMed Central journal article supplement (PMC1425850)
Supplement: plntcell_tpc.105.039263_6.pdf [file plntcell_tpc.105.039263_6.pdf]

**Supplemental Table 1. Biological Material**

| Biological material      | Relevant characteristics                                                                                                                                                                                                                                       | Reference                    |
|--------------------------|----------------------------------------------------------------------------------------------------------------------------------------------------------------------------------------------------------------------------------------------------------------|------------------------------|
| Fungal strains           |                                                                                                                                                                                                                                                                |                              |
| <i>Epichloë festucae</i> |                                                                                                                                                                                                                                                                |                              |
| F11 (PN2278)             | Wild-type                                                                                                                                                                                                                                                      | (Young <i>et al.</i> , 2005) |
| FR2 (PN2325)             | F11/ <i>noxA</i> ::pAN7-1; Hyg <sup>R</sup>                                                                                                                                                                                                                    | This study                   |
| C5 (PN2331)              | FR2/pPN74; Hyg <sup>R</sup> ; Gen <sup>R</sup>                                                                                                                                                                                                                 | This study                   |
| C8 (PN2332)              | FR2/pPN74; Hyg <sup>R</sup> ; Gen <sup>R</sup>                                                                                                                                                                                                                 | This study                   |
| WG11 (PN2467)            | F11/pPN82; Hyg <sup>R</sup>                                                                                                                                                                                                                                    | This study                   |
| FR2G6 (PN2468)           | FR2/pII99; pPN83; Hyg <sup>R</sup> ; Gen <sup>R</sup>                                                                                                                                                                                                          | This study                   |
| A17 (PN2326)             | F11/ $\Delta$ <i>noxA</i> :: <i>P<sub>trpC</sub>-hph</i> ; Hyg <sup>R</sup>                                                                                                                                                                                    | This study                   |
| A44 (PN2327)             | F11/ $\Delta$ <i>noxA</i> :: <i>P<sub>trpC</sub>-hph</i> ; Hyg <sup>R</sup>                                                                                                                                                                                    | This study                   |
| B7 (PN2469)              | F11/ $\Delta$ <i>noxB</i> :: <i>P<sub>trpC</sub>-nptII-T<sub>trpC</sub></i> ; Gen <sup>R</sup>                                                                                                                                                                 | This study                   |
| A44.B29 (PN2470)         | A44/ $\Delta$ <i>noxB</i> :: <i>P<sub>trpC</sub>-nptII-T<sub>trpC</sub></i> ; Hyg <sup>R</sup> ; Gen <sup>R</sup>                                                                                                                                              | This study                   |
| Bacterial strains        |                                                                                                                                                                                                                                                                |                              |
| <i>Escherichia coli</i>  |                                                                                                                                                                                                                                                                |                              |
| DH5 $\alpha$             | F <sup>-</sup> , $\phi$ 80 <i>lacZ</i> , $\Delta$ M15, $\Delta$ ( <i>lacZYA-argF</i> ), U169, <i>recA1</i> ,<br><i>endA1</i> , <i>hsdR17</i> ( $r_k^-$ , $m_k^-$ ), <i>phoA</i> , <i>supE44</i> , $\lambda^-$ , <i>thi-1</i> ,<br><i>gyrA96</i> , <i>relA1</i> | Invitrogen                   |

|       |                                                                                                                                                                                                                                                                                  |            |
|-------|----------------------------------------------------------------------------------------------------------------------------------------------------------------------------------------------------------------------------------------------------------------------------------|------------|
| TOP10 | $F^-$ , <i>mcrA</i> , $\Delta(mrr-hsdRMS-mcrBC)$ , $\phi 80lacZ\Delta M15$ ,<br><i><math>\Delta lacX74</math></i> , <i>deoR</i> , <i>recA1</i> , <i>araD139</i> , $\Delta(ara-leu)7697$<br><i>galU</i> , <i>galK</i> , <i>rpsL(Str<sup>R</sup>)</i> , <i>endA1</i> , <i>nupG</i> | Invitrogen |
|-------|----------------------------------------------------------------------------------------------------------------------------------------------------------------------------------------------------------------------------------------------------------------------------------|------------|

Plasmids

|                                  |                                                                                                                                            |                               |
|----------------------------------|--------------------------------------------------------------------------------------------------------------------------------------------|-------------------------------|
| pBlueScriptII <sup>®</sup> KS(+) | Amp <sup>R</sup>                                                                                                                           | Stratagene                    |
| pGEM <sup>®</sup> -T easy        | Amp <sup>R</sup>                                                                                                                           | Promega                       |
| pPN1686 (PN1961)                 | pFunGus containing 1.4-kb <i>HindIII</i> ( <i>HpaI</i> plus linkers) fragment from pCB1004; Amp <sup>R</sup> /Hyg <sup>R</sup>             | This study                    |
| pII99 (PN1687)                   | Amp <sup>R</sup> /Gen <sup>R</sup> ( <i>PtpC-nptII-TtrpC</i> )                                                                             | (Namiki <i>et al.</i> , 2001) |
| pPN70 (PN1962)                   | pMOcosX <i>noxA</i> cosmid                                                                                                                 | This study                    |
| pPN71 (PN1963)                   | pMOcosX <i>noxB</i> cosmid                                                                                                                 | This study                    |
| pPN72 (PN1964)                   | 15-kb <i>ClaI</i> fragment containing pAN7-1 from FR2                                                                                      | This study                    |
| pPN73 (PN1965)                   | pBlueScriptII <sup>®</sup> KS(+) containing 5.1-kb <i>XbaI/XhoI</i> <i>noxA</i> fragment                                                   | This study                    |
| pPN74 (PN1966)                   | pII99 containing 5.1-kb <i>XbaI/XhoI</i> <i>noxA</i> fragment ex pPN70                                                                     | This study                    |
| pPN75 (PN1967)                   | pBlueScriptII <sup>®</sup> KS(+) containing 5' <i>noxA</i> - <i>PtpC</i> - <i>hph</i> -3' <i>noxA</i> ; Amp <sup>R</sup> /Hyg <sup>R</sup> | This study                    |
| pPN76 (PN1968)                   | pBlueScriptII <sup>®</sup> KS(+) containing 5.6-kb <i>XhoI</i> <i>noxB</i> fragment                                                        | This study                    |
| pPN77 (PN1969)                   | pBlueScriptII <sup>®</sup> KS(+) containing 2.7-kb <i>XhoI</i> <i>noxB</i> fragment                                                        | This study                    |

|                |                                                                                                                                                                  |            |
|----------------|------------------------------------------------------------------------------------------------------------------------------------------------------------------|------------|
| pPN78 (PN1970) | pBlueScriptII <sup>®</sup> KS(+) containing 5' <i>noxB</i> - <i>PtrpC</i> - <i>nptII</i> - <i>TtrpC</i> -3' <i>noxB</i> ; Amp <sup>R</sup> /Gen <sup>R</sup>     | This study |
| pPN82 (PN1878) | pBlueScriptII <sup>®</sup> KS(+) containing 1.4-kb <i>HindIII</i> fragment from pCB1004 and <i>Pgpd</i> -EGFP- <i>TtrpC</i> ; Amp <sup>R</sup> /Hyg <sup>R</sup> | This study |
| pPN83 (PN1874) | pBlueScriptII <sup>®</sup> KS(+) containing <i>Pgpd</i> -EGFP- <i>TtrpC</i> ; Amp <sup>R</sup>                                                                   | This study |

#### Plant material

##### *Lolium perenne*

|       |                                |            |
|-------|--------------------------------|------------|
| G1492 | <i>L. perenne</i> /F11         | This study |
| G1495 | <i>L. perenne</i> /F11         | This study |
| G1496 | <i>L. perenne</i> /F11         | This study |
| G1506 | <i>L. perenne</i> /C5          | This study |
| G1508 | <i>L. perenne</i> /C5          | This study |
| G1511 | <i>L. perenne</i> /C5          | This study |
| G1512 | <i>L. perenne</i> /C8          | This study |
| G1513 | <i>L. perenne</i> /C8          | This study |
| G1516 | <i>L. perenne</i> /C8          | This study |
| G1881 | <i>L. perenne</i> /FR2         | This study |
| G1882 | <i>L. perenne</i> /FR2         | This study |
| G1883 | <i>L. perenne</i> /FR2         | This study |
| G1521 | <i>L. perenne</i> - uninfected | This study |

|       |                                |            |
|-------|--------------------------------|------------|
| G1522 | <i>L. perenne</i> - uninfected | This study |
| G1531 | <i>L. perenne</i> /A17         | This study |
| G1534 | <i>L. perenne</i> /A17         | This study |
| G1536 | <i>L. perenne</i> /A44         | This study |
| G1884 | <i>L. perenne</i> /A44         | This study |
| G1885 | <i>L. perenne</i> /WG11        | This study |
| G1886 | <i>L. perenne</i> /FR2G6       | This study |
| G1945 | <i>L. perenne</i> /F11         | This study |
| G1946 | <i>L. perenne</i> /F11         | This study |
| G1947 | <i>L. perenne</i> /F11         | This study |
| G1948 | <i>L. perenne</i> /A44         | This study |
| G1949 | <i>L. perenne</i> /A44         | This study |
| G1950 | <i>L. perenne</i> /A44         | This study |

---
