# Supplementary material
Source: PubMed Central journal article supplement (PMC1425850)
Supplement: plntcell_tpc.105.039263_7.pdf [file plntcell_tpc.105.039263_7.pdf]

**Supplemental Table 2.** Primers used in this study.

| Primer    | Sequence                                           | Purpose                                              |
|-----------|----------------------------------------------------|------------------------------------------------------|
| noxAf     | CTTCAGAACCGCGACTAGCA                               | pPN70 isolation                                      |
| noxAr     | TGCAGAGGAGCATGACATGT                               | pPN70 isolation                                      |
| noxAf2    | CAACAGAAATTACCATGGCG                               | noxA expression; noxA cDNA; pPN75 replacement screen |
| noxAr2    | GAACTGGACCTCGACGACAT                               | noxA expression; pPN75 replacement screen            |
| efnox1a   | CAAGCAAAGCTCTACGATGG                               | DNA sequencing                                       |
| efnox1b   | GCTTTTGCATGCGGACTTGA                               | noxA cDNA                                            |
| efnox1e   | GCTGACTTCCTCCTGAGGTT                               | DNA sequencing                                       |
| Pefnox1Ba | GGAT <u>CCA</u> AGCTGAGTAGCAGAC <sup>1</sup>       | DNA sequencing                                       |
| Pefnox1Nc | <u>CCGCCATGGTAATTTCTGTTGC</u> <sup>1</sup>         | DNA sequencing                                       |
| ANCI1     | TGAACACACCCAGGTCAATC                               | DNA sequencing                                       |
| ANCI2     | CGTCGAATTCCCTCAAGATCC                              | DNA sequencing                                       |
| ANCI3     | GGCCGAATATGTTGCTCCCA                               | DNA sequencing                                       |
| Xbxh1     | AGCCATGCGTGTATCAGCAG                               | DNA sequencing                                       |
| efnox1f   | GACGAGACATGGCATAGCAT                               | DNA sequencing                                       |
| nox2a     | G <u>CCCA</u> T <u>TGGA</u> CAACTTTGC <sup>1</sup> | noxB degenerate PCR; noxB probe (Fig 5B)             |
| nox2b     | TGGCAGT <u>TCT</u> GGATGTACGG <sup>1</sup>         | noxB degenerate PCR                                  |
| nox2c     | TTGGTGT <u>GCT</u> CCTTCTTGAT <sup>1</sup>         | noxB degenerate PCR                                  |
| nox2d     | TTGGGACCGCAGAAGAACAC                               | noxB degenerate PCR; noxB probe (Fig 5B)             |
| nox2e     | AAAAGTTTGACCGATGGATG                               | pPN78 replacement screen; noxB expression,           |

|          |                                            | noxB cDNA                                 |
|----------|--------------------------------------------|-------------------------------------------|
| nox2f    | CTTGTTTTTGGCAGCGACCT                       | DNA sequencing                            |
| Nox2g    | AAGATGAGCGCATGCGTGAG                       | DNA sequencing                            |
| Nox2h    | CAGCTCACTGCACGTGTACT                       | DNA sequencing                            |
| nox2i    | CGACCTCAACATGGGATATC                       | DNA sequencing                            |
| nox2j    | AATGGAGGCAAACGGCGTGA                       | pPN78 replacement screen; noxB expression |
| nox2k    | TGGCGGCAAGTCGAATGAAT                       | pPN78 replacement screen (3')             |
| nox2l    | ATCAACCCAGAACAGCCCAT                       | pPN78 replacement screen (5')             |
| efnox2m  | AAGGTCGGGAGATCCACATC                       | DNA sequencing                            |
| efnox2n  | GTCGGTCTTGTACACATGAG                       | DNA sequencing                            |
| efnox2o  | AACCATCCAGGTCCATAGGC                       | DNA sequencing                            |
| efnox2p  | CATGTGTACAAGACCGACAG                       | DNA sequencing                            |
| efnox2q  | TCTTGTTACCGTCCAGAATC                       | DNA sequencing                            |
| efnox2r  | AACCTATTTCGTACCGTCTCC                      | DNA sequencing                            |
| efnox2s  | TTCAGGCACAAGAGGGTCGT                       | DNA sequencing                            |
| efnox2t  | CTTGTATGACATCGTTGTGG                       | DNA sequencing                            |
| efnox2u  | GCCCCAAACATACGAGAATC                       | noxB cDNA                                 |
| Sm1.2hr  | <u>CTCGAGACGGTACGAATAGGTT</u> <sup>1</sup> | pPN78 construct preparation               |
| Xh2.8Hf  | <u>AAGCTTGTGGCAATACCATCC</u> <sup>1</sup>  | DNA sequencing                            |
| Xh2.8spe | <u>GAACTAGTGCGGGTCAATACAT</u> <sup>1</sup> | pPN78 construct preparation               |
| pII99-1  | CTTTGAACAGCGACGGTC                         | pPN78 replacement screen (5')             |
| pII99-2  | TTGAGTGAGCTGATACCG                         | PCR of pPN78 for noxB replacement         |

|            |                         |                                                                                                         |
|------------|-------------------------|---------------------------------------------------------------------------------------------------------|
| pII99-3    | GGCTGGCTTAACTATGCG      | FR2/pPN74 PCR screen; PCR of pPN74 for noxA probe (Fig 5B);PCR of pPN78 for noxB replacement            |
| pII99-4    | CCCAGAATGCACAGGTAC      | pPN78 replacement screen (3'); FR2/pPN74 PCR screen; PCR of pPN74 for noxA probe (Fig 5B)               |
| T1.1       | GAGAAAATGCGTGAGATTGT    | tubB expression                                                                                         |
| T1.2       | TGGTCAACCAGCTCAGCACC    | tubB expression                                                                                         |
| pgpdNc     | CCATGGTGATGTCTGCTCAA    | pPN82 construct preparation (Pgpd)                                                                      |
| TnotI      | ATAGCGGCCGCACTTAACGTTA  | pPN82 construct preparation (TtrpC)                                                                     |
| Tsc2       | GCCCCGCGTTACTATTGTATAC  | pPN82 construct preparation (TtrpC)                                                                     |
| M13F       | GCCAGGGTTTTCCCAGTCACGA  | PCR of pPNXX for pPN71 isolation; PCR of pPN75 for noxA replacement                                     |
| M13R       | GAGCGGATAACAATTTACACAGG | PCR of pPNXX for pPN71 isolation; PCR of pPN75 for noxA replacement; pPN82 construct preparation (Pgpd) |
| LpPR1-F    | ACGGCGAGAACATCTTCTGG    | PR1 expression                                                                                          |
| LpPR1-R    | CGCCGAGGTTGTTGTCGCAG    | PR1 expression                                                                                          |
| LpPR5-F    | GCCAGTGGGCGGTGGTAGGC    | PR5 expression                                                                                          |
| LpPR5-R    | ATGCCGATGTTGAACCCGTC    | PR5 expression                                                                                          |
| Lp-actin-F | GCTGTTTTCCCTAGCATTGTTGG | Act1 expression                                                                                         |
| Lp-actin-R | ATAAGAGAATCCGTGAGATCCCG | Act1 expression                                                                                         |
| endo1      | ACCCTTTGACTACGTGG       | Real time PCR                                                                                           |

endo2 AGATGTTGTGGGCGAC

Real time PCR

---

<sup>1</sup>Bases underlined are mismatches to *E. festucae* sequence
