# Supplementary material
Source: PubMed Central journal article supplement (PMC1425850)

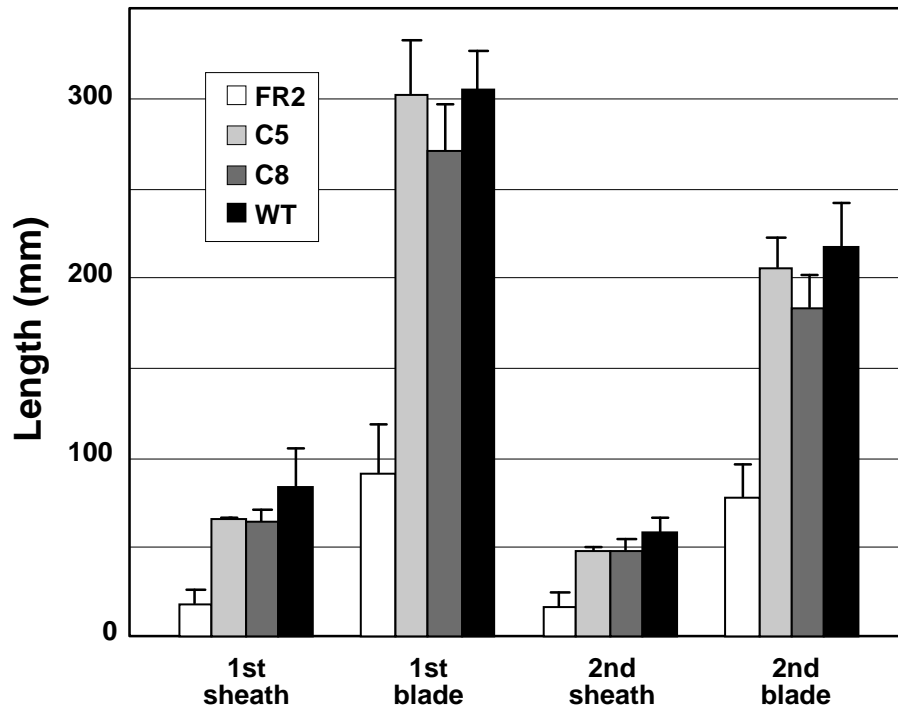

Supplement: plntcell_tpc.105.039263_1.pdf [file plntcell_tpc.105.039263_1.pdf]

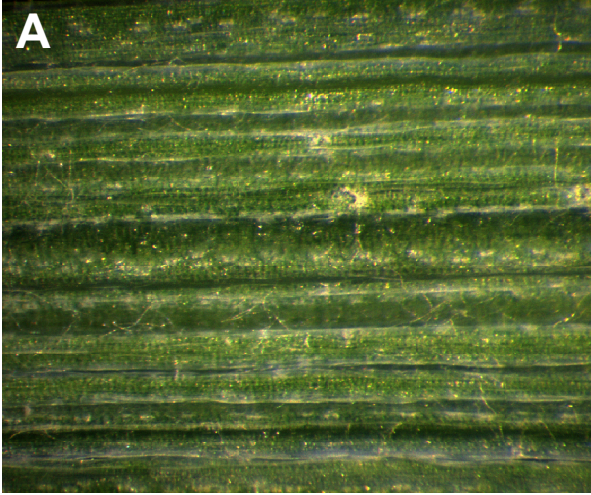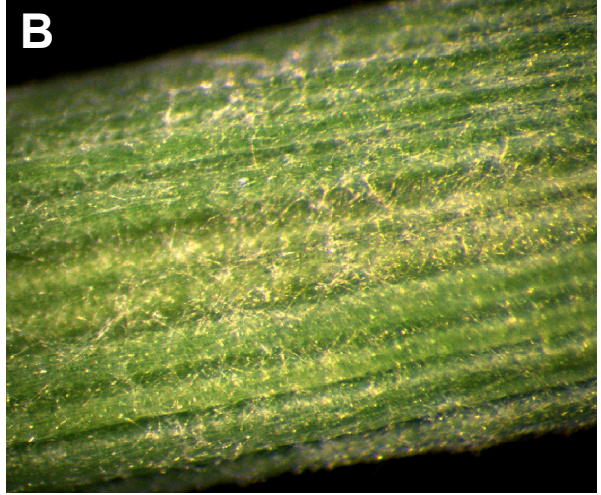

Supplement: plntcell_tpc.105.039263_2.pdf [file plntcell_tpc.105.039263_2.pdf]

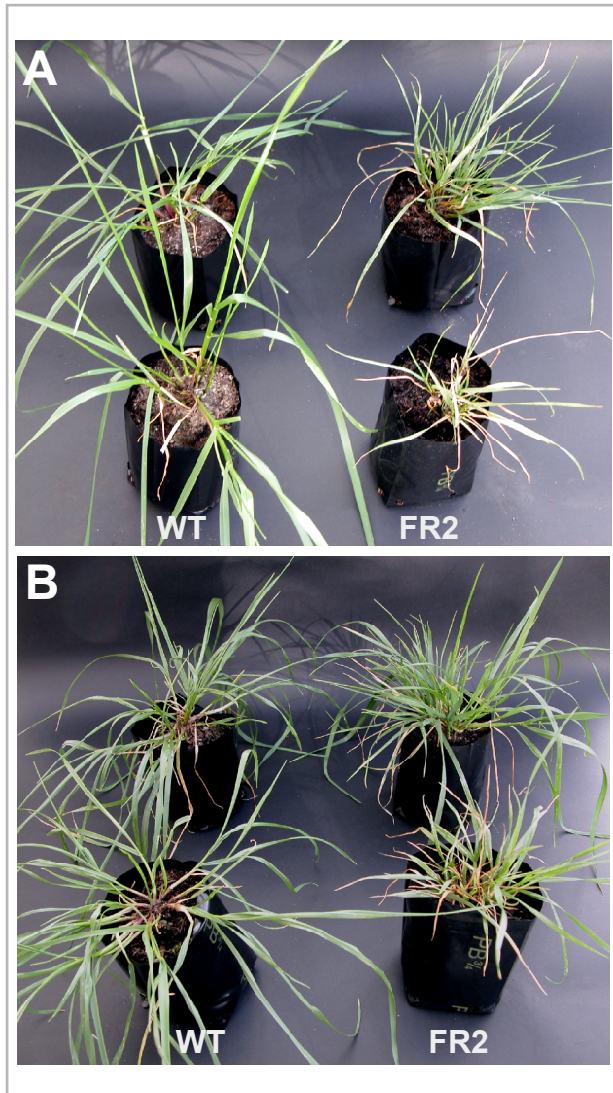

Supplement: plntcell_tpc.105.039263_3.pdf [file plntcell_tpc.105.039263_3.pdf]

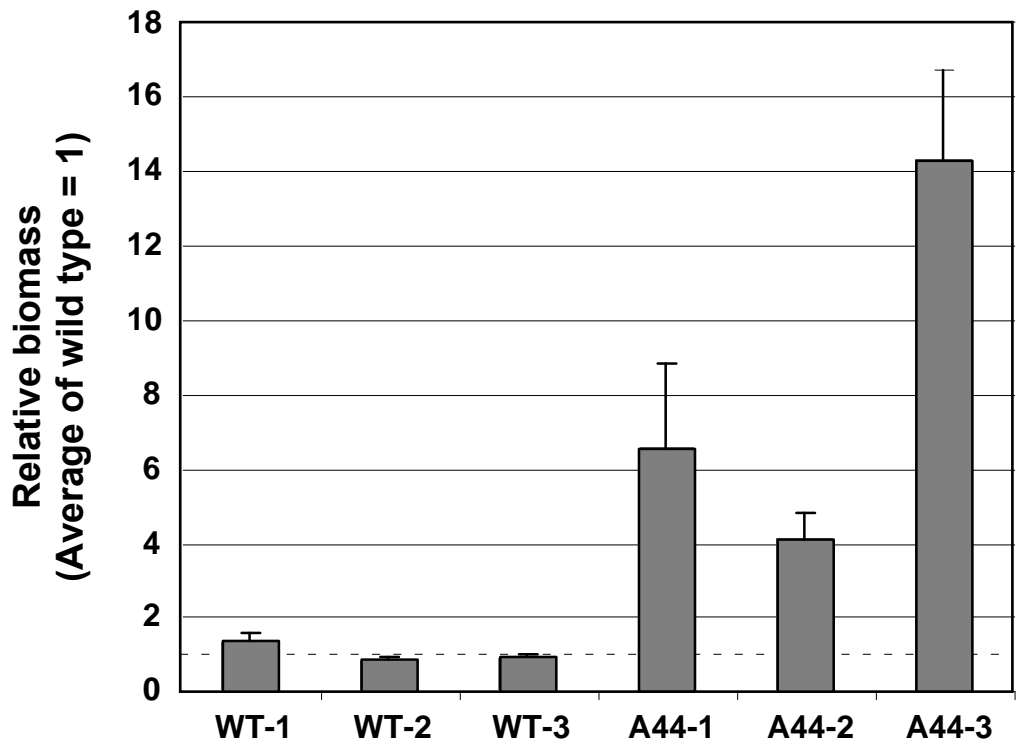

Supplement: plntcell_tpc.105.039263_4.pdf [file plntcell_tpc.105.039263_4.pdf]

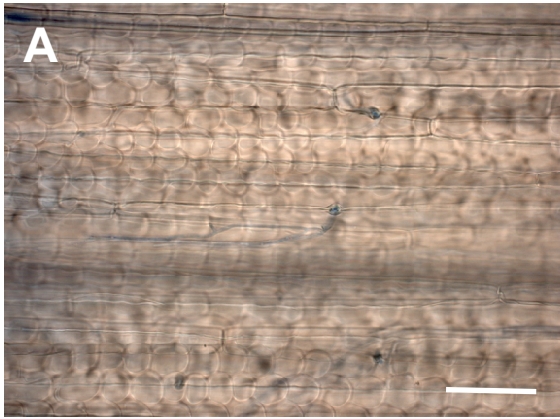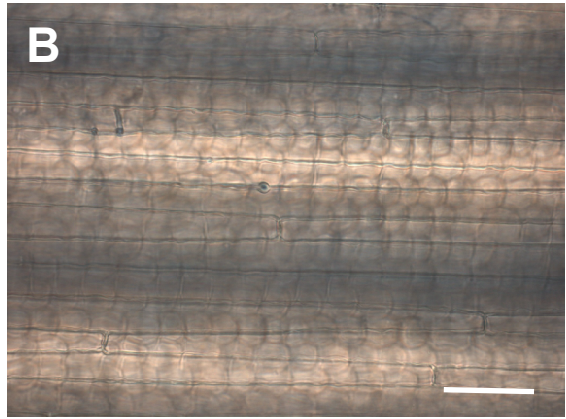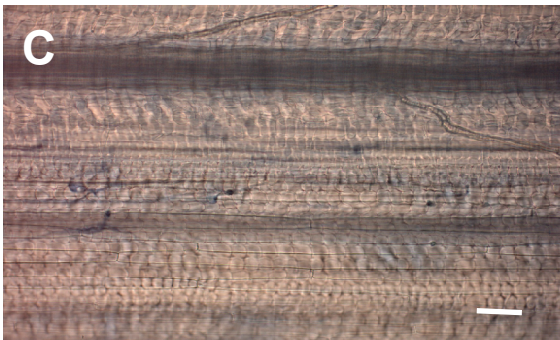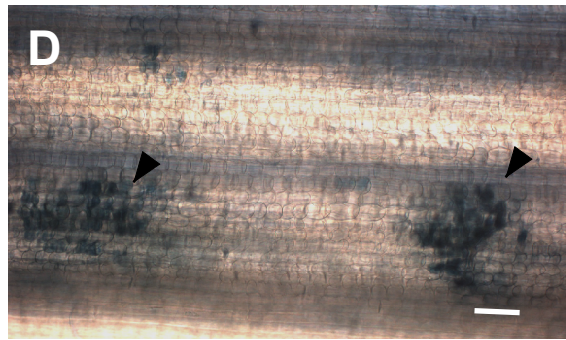

Supplement: plntcell_tpc.105.039263_5.pdf [file plntcell_tpc.105.039263_5.pdf]
